# Supplementary material
Source: PubMed Central journal article supplement (PMC7654284)
Supplement: NIHMS1591532-supplement-Supplemental_Material.pdf [file NIHMS1591532-supplement-Supplemental_Material.pdf]

## Supplemental Material

**Supplementary Figure S1.** Consolidated Standards of Reporting Trials (CONSORT) diagram and retention rates of 12-month follow-up.

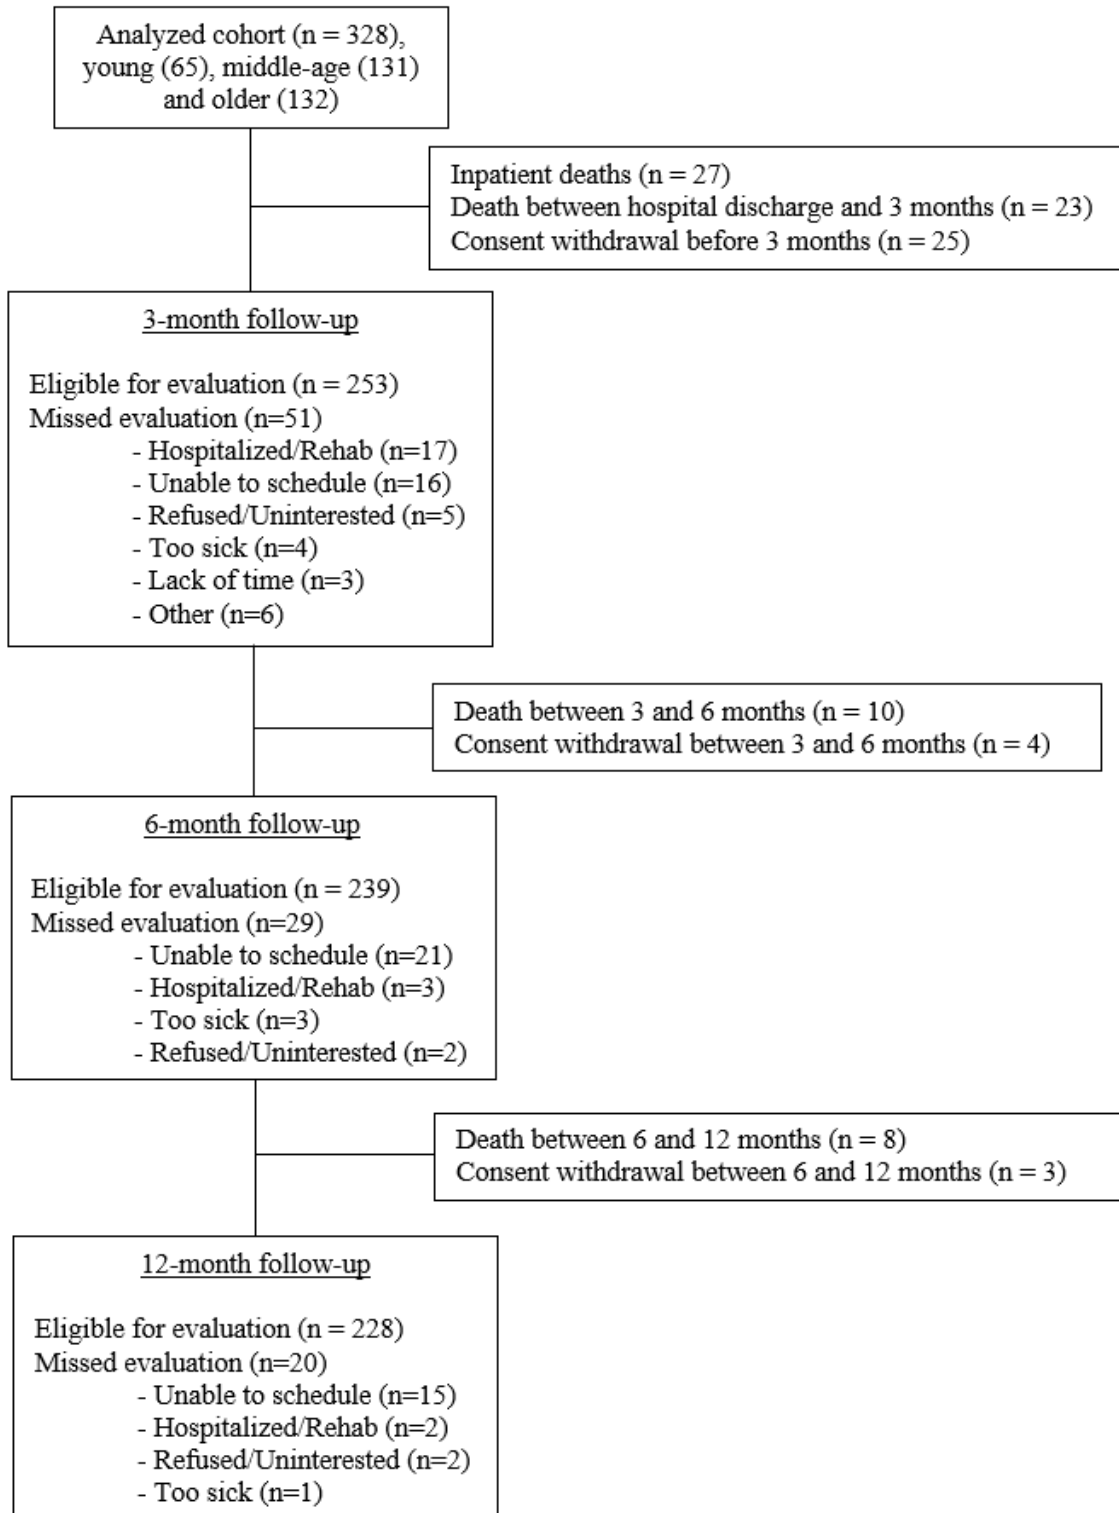

**Supplementary Figure S2.** 12-month survival estimates (A) and Zubrod Performance Status at baseline and at three, six and 12 month follow-up (B) by age groups, including a breakdown of the older group into 65-74 and  $\geq 75$  years.

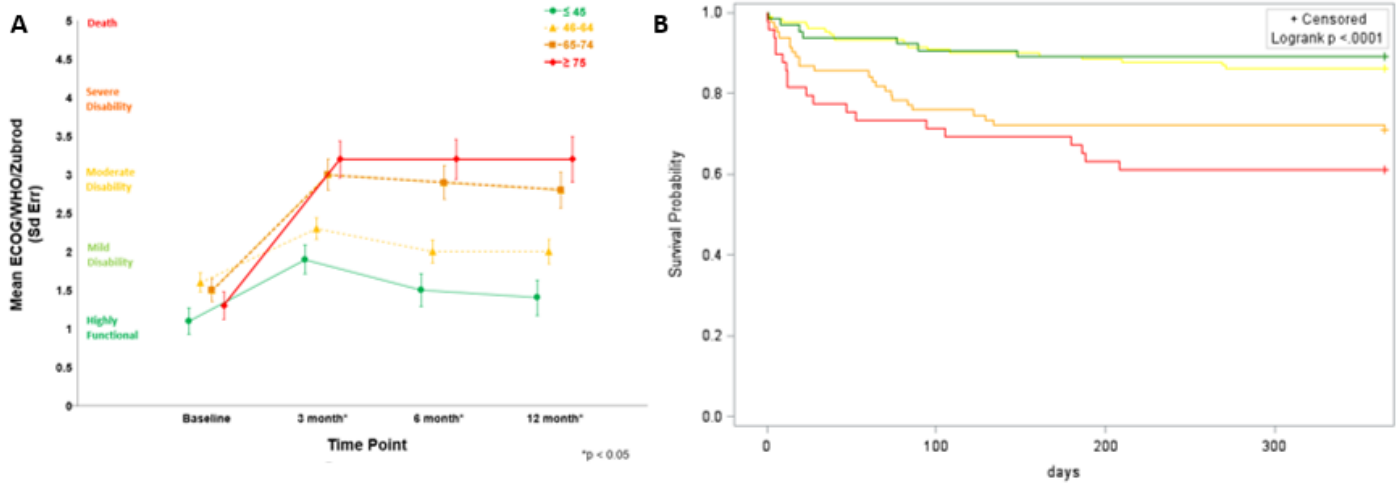

**Supplementary Figure S3.** SOFA scores over 14 days by age groups, including a breakdown of the older group into 65-74 and  $\geq 75$  years.

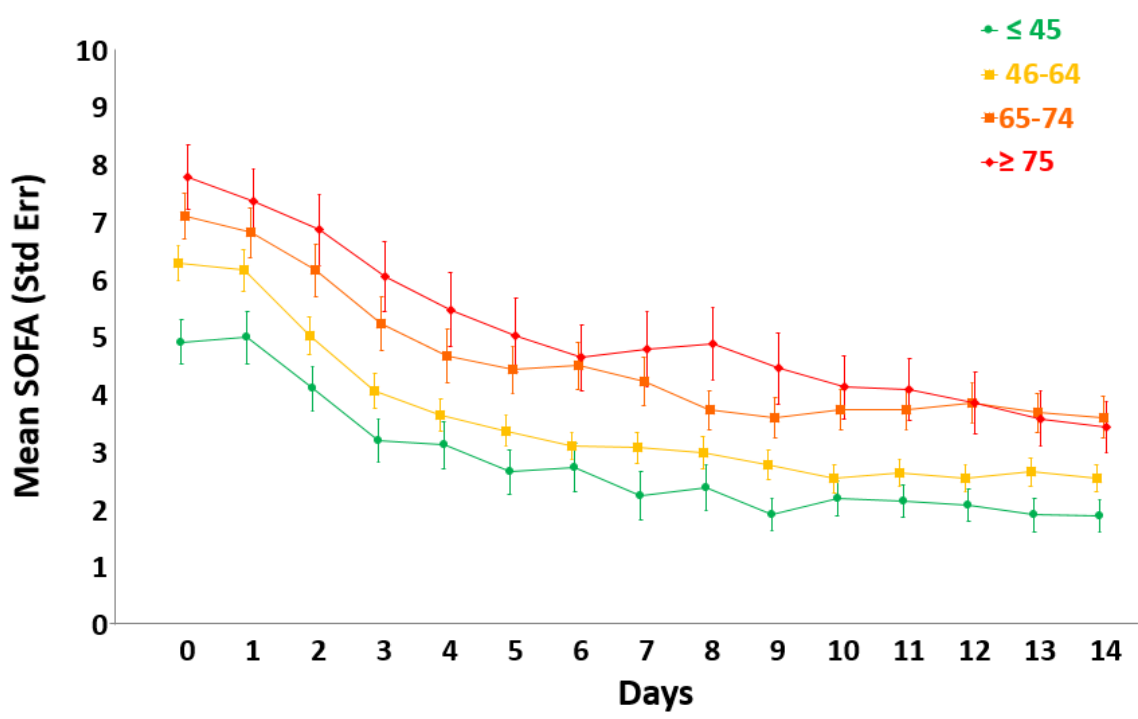

**Supplementary Table S1.** Post-sepsis causes of death by all age groups.

| <b>Age Groups<br/>n (%)</b>     | <b>Young<br/>65 (20%)</b> | <b>Middle-age<br/>131 (40%)</b> | <b>Older 65-74<br/>83 (25%)</b> | <b>Older ≥ 75<br/>49 (15%)</b> |
|---------------------------------|---------------------------|---------------------------------|---------------------------------|--------------------------------|
| 30-day mortality, n (%)         | 4 (6)                     | 5 (4)                           | 12 (14)                         | 11 (22)                        |
| MOF                             | 3 (75)                    | 4 (80)                          | 8 (67)                          | 5 (45)                         |
| Respiratory failure/ARDS        | 0 (0)                     | 0 (0)                           | 0 (0)                           | 2 (18)                         |
| Sepsis (recurrent)              | 1 (25)                    | 1 (20)                          | 0 (0)                           | 3 (27)                         |
| End-stage vascular disease      | 0 (0)                     | 0 (0)                           | 3 (25)                          | 1 (9)                          |
| End-stage cancer                | 0 (0)                     | 0 (0)                           | 0 (0)                           | 0 (0)                          |
| Heart failure/MI                | 0 (0)                     | 0 (0)                           | 1 (8)                           | 0 (0)                          |
| >30-day mortality (late deaths) | 3 (5)                     | 13 (10)                         | 12 (14)                         | 8 (16)                         |
| MOF                             | 0 (0)                     | 3 (23)                          | 2 (17)                          | 3 (38)                         |
| Sepsis (recurrent)              | 0 (0)                     | 1 (8)                           | 2 (17)                          | 2 (25)                         |
| End-stage cancer                | 0 (0)                     | 5 (38)                          | 2 (17)                          | 1 (13)                         |
| Heart failure/MI                | 0 (0)                     | 2 (15)                          | 3 (25)                          | 0 (0)                          |
| End-stage vascular disease      | 1 (33)                    | 1 (8)                           | 1 (8)                           | 0 (0)                          |
| Renal Failure                   | 0 (0)                     | 0 (0)                           | 1 (8)                           | 1 (13)                         |
| CVA                             | 0 (0)                     | 1 (8)                           | 1 (8)                           | 1 (13)                         |
| Unknown                         | 2 (67)                    | 0 (0)                           | 0 (0)                           | 0 (0)                          |

MOF=multi-organ failure, ARDS=acute respiratory distress syndrome, MI=myocardial infarction, CVA=cerebrovascular accident.

**Supplementary Table S2.** Baseline demographics, characteristics of the inciting septic event and predisposition by older age groups.

| <b>Age Groups<br/>n (%)</b>                  | <b>Older 65-74<br/>83 (25%)</b> | <b>Older ≥ 75<br/>49 (15%)</b> |
|----------------------------------------------|---------------------------------|--------------------------------|
| Male, n (%)                                  | 46 (55)                         | 28 (57)                        |
| Age in years, median (IQR 25th, 75th)        | 69 (67, 72)                     | 79 (76, 83)                    |
| Race, n (%)                                  |                                 |                                |
| Caucasian (White)                            | 76 (92)                         | 45 (92)                        |
| African American                             | 5 (6)                           | 4 (8)                          |
| American Indian                              | 0 (0)                           | 0 (0)                          |
| Asian                                        | 1 (1)                           | 0 (0)                          |
| Other                                        | 0 (0)                           | 0 (0)                          |
| Unknown                                      | 1 (1)                           | 0 (0)                          |
| Ethnicity, n (%)                             |                                 |                                |
| Hispanic or Latino                           | 1 (1)                           | 0 (0)                          |
| Not Hispanic or Latino                       | 82 (99)                         | 49 (100)                       |
| BMI, median (25th, 75th)                     | 28.4 (24.7, 35.6)               | 26.3 (23.9, 32.3)              |
| Morbid obesity n (%)                         | 13 (16) <sup>a</sup>            | 0 (0)                          |
| Comorbidities, n (%)                         |                                 |                                |
| Hypertension                                 | 67 (81)                         | 38 (78)                        |
| Coronary artery disease                      | 36 (43)                         | 22 (45)                        |
| Diabetes                                     | 36 (43)                         | 16 (33)                        |
| Chronic lung disease                         | 24 (29)                         | 13 (27)                        |
| Atrial fibrillation                          | 18 (22)                         | 11 (22)                        |
| Chronic renal disease                        | 17 (21)                         | 10 (20)                        |
| Heart failure                                | 23 (28)                         | 5 (10)                         |
| Peripheral artery disease                    | 18 (22)                         | 10 (20)                        |
| Active cancer                                | 15 (18)                         | 7 (14)                         |
| Prior Stroke                                 | 7 (8)                           | 5 (10)                         |
| Substance abuse                              | 8 (10)                          | 0 (0)                          |
| Dementia                                     | 2 (2)                           | 4 (8)                          |
| Liver disease                                | 1 (1)                           | 1 (2)                          |
| ESRD                                         | 2 (2)                           | 1 (2)                          |
| Number of comorbidities (adjudicated), n (%) |                                 |                                |
| 0                                            | 4 (5)                           | 1 (2)                          |
| 1                                            | 9 (11)                          | 11 (22)                        |
| 2                                            | 17 (21)                         | 11 (22)                        |
| ≥3                                           | 53 (64)                         | 26 (53)                        |
| Reason for Hospital Admission, n (%)         |                                 |                                |
| Planned Surgery                              | 14 (17)                         | 14 (29)                        |
| Trauma                                       | 6 (7)                           | 4 (8)                          |
| Active Infection                             | 52 (63)                         | 27 (55)                        |
| Non-Infectious / Chronic Problems            | 11 (13)                         | 4 (8)                          |
| Emergency surgery (within 24 hrs), n (%)     | 40 (48)                         | 20 (41)                        |
| Sepsis present on admission (≤48 hrs), n (%) | 49 (59)                         | 25 (51)                        |
| Hospital-acquired sepsis (>48 hrs), n (%)    | 34 (41)                         | 24 (49)                        |
| Type of Infection n (%)                      |                                 |                                |
| Intra- abdominal                             | 34 (41)                         | 15 (31)                        |
| Surgical Site Infection                      | 13 (16)                         | 10 (20)                        |
| Pneumonia                                    | 13 (16)                         | 10 (20)                        |
| Necrotizing Soft Tissue Infection            | 6 (7)                           | 1 (2)                          |
| Urosepsis                                    | 10 (12)                         | 9 (18)                         |

|                                                   |             |             |
|---------------------------------------------------|-------------|-------------|
| Other                                             | 6 (7)       | 3 (6)       |
| Catheter Related Blood Stream Infection           | 1 (1)       | 1 (2)       |
| Sepsis severity, n (%)                            |             |             |
| Sepsis                                            | 21 (25)     | 10 (20)     |
| Severe Sepsis                                     | 32 (39)     | 22 (45)     |
| Septic Shock                                      | 30 (36)     | 17 (35)     |
| APACHE II Score (24 hrs), median (IQR 25th, 75th) | 21 (15, 26) | 19 (16, 26) |
| SOFA score (24 hrs), median (IQR 25th, 75th)      |             |             |
| Culture Negative                                  | 33 (40)     | 23 (47)     |
| Culture Positive                                  | 50 (60)     | 26 (53)     |
| Bacterial – gram positive                         | 16 (32)     | 6 (23)      |
| Bacterial – gram negative                         | 17 (34)     | 13 (50)     |
| Fungal                                            | 3 (6)       | 0 (0)       |
| Polymicrobial                                     | 14 (28)     | 7 (27)      |
| Sepsis Source Control Procedure, n (%)            | 52 (63)     | 31 (63)     |
| Invasive procedures                               | 40 (77)     | 24 (77)     |
| Non-invasive procedures                           | 12 (23)     | 7 (23)      |

---

BMI = Body Mass Index, IQR = Interquartile Range, APACHE II = Acute Physiology + Age + Chronic Health Evaluation, SOFA = the Sequential Organ Failure Assessment. Statistical difference was labeled as <sup>a</sup> older 65-74 vs  $\geq$  75 years old, with statistical significance set at  $p < 0.05$ .

**Supplementary Table S3.** Admission service and types of sepsis source control by all age groups.

|                                               | <b>Young<br/>65 (20%)</b> | <b>Middle-age<br/>131 (40%)</b> | <b>Older 65-74<br/>83 (25%)</b> | <b>Older ≥ 75<br/>49 (15%)</b> |
|-----------------------------------------------|---------------------------|---------------------------------|---------------------------------|--------------------------------|
| <b>Admission Service n, (%)</b>               |                           |                                 |                                 |                                |
| Trauma Acute Care Surgery                     | 32 (49)                   | 58 (44)                         | 38 (46)                         | 14 (29)                        |
| Vascular                                      | 4 (6)                     | 10 (8)                          | 21 (25)                         | 14 (29)                        |
| Pancreaticobiliary                            | 5 (7)                     | 14 (11)                         | 6 (7)                           | 5 (10)                         |
| Colorectal                                    | 2 (3)                     | 6 (5)                           | 2 (2)                           | 2 (4)                          |
| Minimally Invasive Surgery                    | 3 (5)                     | 10 (8)                          | 1 (1)                           | 2 (4)                          |
| Urology                                       | 8 (11)                    | 16 (12)                         | 6 (8)                           | 8 (16)                         |
| Otolaryngology                                | 1 (2)                     | 3 (2)                           | 2 (2)                           | 1 (2)                          |
| Plastic Surgery                               | 1 (2)                     | 1 (1)                           | 0 (0)                           | 1 (2)                          |
| Orthopedic Surgery                            | 2 (3)                     | 1 (1)                           | 4 (6)                           | 1 (2)                          |
| Obstetrics / Gynecology                       | 3 (5)                     | 7 (4)                           | 1 (1)                           | 0 (0)                          |
| Transplant                                    | 2 (3)                     | 3 (2)                           | 0 (0)                           | 0 (0)                          |
| Cardiothoracic                                | 0 (0)                     | 2 (2)                           | 1 (1)                           | 1 (2)                          |
| Breast Melanoma Sarcoma Endocrine             | 1 (2)                     | 0 (0)                           | 1 (1)                           | 0 (0)                          |
| Oral/Maxillofacial Surgery                    | 1 (2)                     | 0 (0)                           | 0 (0)                           | 0 (0)                          |
| <b>Sepsis Source Control Procedure, n (%)</b> |                           |                                 |                                 |                                |
| Invasive procedures                           | 27 (59)                   | 67 (71)                         | 40 (48)                         | 24 (49)                        |
| Laparotomy                                    | 11 (41)                   | 33 (49)                         | 26 (65)                         | 14 (58)                        |
| Laparoscopic intervention                     | 1 (2)                     | 4 (6)                           | 1 (3)                           | 2 (8)                          |
| Debridement                                   | 11 (41)                   | 25 (37)                         | 4 (10)                          | 2 (8)                          |
| Thoracotomy/Sternotomy/VATS                   | 0 (0)                     | 2 (3)                           | 1 (3)                           | 1 (4)                          |
| Amputation                                    | 0 (0)                     | 1 (2)                           | 2 (5)                           | 0 (0)                          |
| Removal of infected implant/device            | 4 (16)                    | 2 (3)                           | 6 (15)                          | 5 (21)                         |
| Non-invasive procedures                       | 19 (41)                   | 28 (29)                         | 12 (15)                         | 7 (14)                         |
| Percutaneous drainage                         | 15 (78)                   | 15 (54)                         | 5 (42)                          | 3 (43)                         |
| Endoscopic intervention                       | 2 (11)                    | 9 (32)                          | 5 (42)                          | 3 (43)                         |
| Incision & drainage                           | 2 (11)                    | 4 (14)                          | 2 (16)                          | 1 (14)                         |

VATS= Video-assisted thoracoscopic surgery.

**Supplementary Table S4.** Characteristics of the hospital and post-discharge outcomes by older age groups.

| <b>Age Groups<br/>n (%)</b>                             | <b>Older 65-74<br/>83 (25%)</b> | <b>Older ≥ 75<br/>49 (15%)</b> |
|---------------------------------------------------------|---------------------------------|--------------------------------|
| Need for mechanical ventilation, n (%)                  | 64 (77)                         | 35 (71)                        |
| Ventilator free days (30 days), median (IQR 25th, 75th) | 27 (21, 30)                     | 27 (9, 30)                     |
| ICU free days (30 days), median (IQR 25th, 75th)        | 19 (8, 24)                      | 20 (5, 26)                     |
| Hospital free days (30 days), median (IQR 25th, 75th)   | 11 (1, 20)                      | 7 (0, 21)                      |
| Secondary infections/patient, mean (SD)                 | 0.7 (0.9)                       | 0.5 (0.8)                      |
| Secondary infections/100 hospital days, mean (SD)       | 2.9 (4)                         | 2.4 (5.5)                      |
| AKI, n (%)                                              |                                 |                                |
| KDIGO Stage 1                                           | 22 (27)                         | 12 (25)                        |
| KDIGO Stage 2                                           | 17 (21)                         | 11 (22)                        |
| KDIGO Stage 3                                           | 17 (21)                         | 7 (14)                         |
| MOF frequency, n (%) – by Denver                        | 17 (21)                         | 12 (25)                        |
| 30-day mortality, n (%)                                 | 12 (15)                         | 11 (22)                        |
| Clinical Trajectory, n (%)                              |                                 |                                |
| Early Death                                             | 6 (7)                           | 3 (6)                          |
| Chronic Critical Illness                                | 35 (42)                         | 20 (41)                        |
| Rapid Recovery                                          | 42 (51)                         | 26 (53)                        |
| Discharge disposition, n (%)                            |                                 |                                |
| “Good” Disposition                                      | 32 (39)                         | 18 (37)                        |
| Home                                                    | 7 (2)                           | 6 (33)                         |
| Homecare                                                | 14 (44)                         | 10 (56)                        |
| Rehab                                                   | 11 (34)                         | 2 (11)                         |
| “Poor” Disposition                                      | 51 (61)                         | 31 (63)                        |
| Long Term Care Hospital                                 | 19 (37)                         | 9 (29)                         |
| Skilled Nursing                                         | 17 (33)                         | 11 (36)                        |
| Another Hospital                                        | 1 (2)                           | 0 (0)                          |
| Hospice                                                 | 3 (6)                           | 3 (10)                         |
| Death                                                   | 11 (22)                         | 8 (25)                         |
| Number of readmissions, mean (SD)                       | 0.8 (1.3)                       | 1 (1.3)                        |

IQR = Interquartile Range, APACHE II = Acute Physiology + Age + Chronic Health Evaluation, SOFA = the Sequential Organ Failure Assessment., KDIGO = Kidney Disease: Improving Global Outcomes, MOF=multi-organ failure, SD = standard deviation.

**Supplementary Table S5.** Long-term follow-up of physical function and cognitive status for overall and by older age groups.

| Age Groups<br>n (%)                     | Older 65-74<br>83 (25%) | Older ≥ 75<br>49 (15%) |
|-----------------------------------------|-------------------------|------------------------|
| <b>Physical function</b>                |                         |                        |
| Total SPPB, mean (SE)                   |                         |                        |
| 3 months                                | 3.8 (1)                 | 3 (1.1)                |
| 6 months                                | 4.4 (1)                 | 3.2 (1.2)              |
| 12 months                               | 4.8 (1.3)               | 5.5 (1.4)              |
| Handgrip strength                       |                         |                        |
| 3 months                                | 29.3 (6.2)              | 22.2 (2.7)             |
| 6 months                                | 23.6 (1.3)              | 19.8 (1.3)             |
| 12 months                               | 18.5 (2.4)              | 20.9 (3.4)             |
| <b>Cognitive function</b>               |                         |                        |
| Hopkins Verbal Learning Test, mean (SE) |                         |                        |
| 3 months                                |                         |                        |
| Total recall                            | 20 (1)                  | 15.9 (1.6)             |
| Delayed recall                          | 5.8 (0.8)               | 4.3 (1.2)              |
| Retention                               | 66.9 (7.54)             | 60.7 (13.6)            |
| 6 months                                |                         |                        |
| Total recall                            | 18.8 (2.1)              | 20.4 (1.41)            |
| Delayed recall                          | 5.3 (0.99)              | 5.9 (0.95)             |
| Retention                               | 59.8 (10.4)             | 65.1 (9.56)            |
| 12 months                               |                         |                        |
| Total recall                            | 21.1 (1.7)              | 19.5 (1.7)             |
| Delayed recall                          | 7.1 (0.6)               | 5.6 (1)                |
| Retention                               | 84.8 (5.5)              | 63.3 (10.4)            |
| COWA                                    |                         |                        |
| 3 months                                | 26.8 (2)                | 32.7 (3)               |
| 6 months                                | 25.7 (1.9)              | 30.5 (1.9)             |
| 12 months                               | 26.1 (2.7)              | 31.2 (2.8)             |
| MMSE                                    |                         |                        |
| 3 months                                | 83.8 (3.8)              | 77.4 (5.5)             |
| 6 months                                | 77.8 (3)                | 82.8 (4.3)             |
| 12 months                               | 85.3 (2.5)              | 84.4 (4.4)             |

SPPB=short physical performance battery, COWA = Controlled Oral Word Association, MMSE = mini-mental state examination, SE=standard error.
